# Supplementary material
Source: PubMed Central journal article supplement (PMC5703039)
Supplement: NIHMS920285-supplement-supple.pdf [file NIHMS920285-supplement-supple.pdf]

## Supplementary Information:

### Targeting PD1-PDL1 Immune Checkpoint in Plasmacytoid Dendritic Cells Interactions with T Cells, Natural Killer Cells, and Multiple Myeloma Cells

Short title: Targeting immune checkpoint PDL1 in myeloma

Arghya Ray<sup>1</sup>, Deepika Sharma Das<sup>1</sup>, Yan Song<sup>1</sup>, Paul Richardson<sup>1</sup>, Dharminder  
Chauhan<sup>1¶</sup>, and Kenneth C. Anderson<sup>1¶</sup>

<sup>1</sup>The LeBow Institute for Myeloma Therapeutics and Jerome Lipper Myeloma Center,  
Department of Medical Oncology, Dana Farber Cancer Institute, Harvard Medical  
School, Boston, MA 02115

¶ These authors contributed equally to this work.

Correspondence: Kenneth C. Anderson, M.D., and Dharminder Chauhan, Ph.D. Dana-  
Farber Cancer Institute, M561, 450 Brookline Ave, Boston, MA.

E-mail: [Kenneth.Anderson@dfci.harvard.edu](mailto:Kenneth.Anderson@dfci.harvard.edu); and

[Dharminder.Chauhan@dfci.harvard.edu](mailto:Dharminder.Chauhan@dfci.harvard.edu)

Word Counts: 1500; Total number of Figures: 2; Supplementary Figures 2; and,

References: 15

**Scientific Category:** Myeloma

#### **Key Words**

Myeloma, Immunotherapy, Plasmacytoid Dendritic Cells, PDL-1, or PD-1

Supplementary Figure 1 **Effect of anti-PDL1 Ab on pDC-induced growth of MM cell lines** MM patient pDCs and MM.1S, MM.1R or RPMI-8226 cells were cultured either alone or together in the presence of isotype-matched control Ab or anti-PDL1 Ab (5  $\mu\text{g/ml}$ ) for 72h, and then analyzed for growth. Data are presented as fold change in MM cell growth in the presence versus absence of pDCs (mean  $\pm$  SD;  $p < 0.05$ ,  $n=3$ ). CpG-ODN-treated (1  $\mu\text{g/ml}$ ) co-cultures of pDCs and MM cells served as a positive control for MM cell growth inhibition (mean  $\pm$  SD;  $p < 0.005$ ). Co-cultures of pDCs and MM cells were performed at 1:5 (pDC:MM) ratio. Growth assays were performed using  $1 \times 10^4$  pDCs and  $5 \times 10^4$  MM cells in 200  $\mu\text{l}$  media in 96 well plates. Error bars indicate SD.

Supplementary Figure 2 **Anti-PDL1 Ab induces MM-specific CD4+ CTLs** Freshly isolated CD4+ T cells from MM patient BM ( $n = 10$ ) were co-cultured with autologous pDCs at 1:10 (pDC:T) ratio in the presence of isotype-matched control Ab or anti-PDL1 Ab (5  $\mu\text{g/ml}$ ) for 5 days; then GFP+ MM.1S cells were added for another 3 days (E:T ratio 20:1 for CD4+T:GFP+ MM.1S), followed by quantification of viable GFP+ MM.1S cells by FACS (*lower panel; bar graph*) (mean  $\pm$  SD;  $p < 0.03$ ). The loss of viable GFP signal is shown in a representative histogram (*upper panel*), indicating MM cell lysis by CD4+ CTLs.
